# Supplementary material for: Hypermethylation-Mediated Silencing of CIDEA, MAL and PCDH17 Tumour Suppressor Genes in Canine DLBCL: From Multi-Omics Analyses to Mechanistic Studies
Source: MDPI journal article supplement (doi:10.3390/ijms23074021), 2022-04-05
Supplement: s1 [file s1]

# Hypermethylation-mediated silencing of *CIDEA*, *MAL* and *PCDH17* tumour suppressor genes in canine DLBCL: from multi-omics analyses to mechanistic studies

Eleonora Zorzan <sup>1</sup>, Ramy Elgendy <sup>1,2</sup>, Giorgia Guerra <sup>1</sup>, Silvia Da Ros <sup>1</sup>, Maria Elena Gelain <sup>1</sup>, Federico Bonsembiante <sup>1,3</sup>, Giulia Garaffo <sup>4</sup>, Nicoletta Vitale <sup>4</sup>, Roberto Piva <sup>4</sup>, Laura Marconato <sup>5</sup>, Luca Aresu <sup>6</sup>, Mauro Dacasto <sup>1</sup> and Mery Giantin <sup>1,\*</sup>

<sup>1</sup> Department of Comparative Biomedicine and Food Science, University of Padua, 35020 Legnaro (PD), Italy; eleonora.zorzan@gmail.com (E.Z.); ramy.elgendy@astrazeneca.com (R.E.); giorgiaguerra94@gmail.com (G.Gu.); silviadaros31@gmail.com (S.D.R.); mariaelena.gelain@unipd.it (M.E.G.); federico.bonsembiante@unipd.it (F.B.); mauro.dacasto@unipd.it (M.D.)

<sup>2</sup> Discovery Biology, Discovery Sciences, R&D, AstraZeneca, Gothenburg, Sweden; ramy.elgendy@astrazeneca.com (R.E.)

<sup>3</sup> Department of Animal Medicine, Productions and Health, University of Padua, 35020, Legnaro (PD), Italy; federico.bonsembiante@unipd.it (F.B.)

<sup>4</sup> Molecular Biotechnology Center, Department of Molecular Biotechnology and Health Sciences, University of Turin, 10126 Turin, Italy; giulia.garaffo@gmail.com (G.Ga.); nicoletta.vitale@unito.it (N.V.); roberto.piva@unito.it (R.P.)

<sup>5</sup> Department of Veterinary Medical Sciences, University of Bologna, 40064 Ozzano dell'Emilia (BO), Italy; laura.marconato@unibo.it

<sup>6</sup> Department of Veterinary Sciences, University of Turin, 10095 Grugliasco (TO), Italy; luca.aresu@unito.it

\* Correspondence: mery.giantin@unipd.it; Tel.: +39.049.8272946

**Abbreviations:**  $\alpha$ CGH, Array Comparative Genomic hybridization; ABC, activated B-cell like; ANOVA, one-way analysis of variance; AU, arbitrary units; AZA, azacytidine; BCL2, BCL2 apoptosis regulator; cDLBCL, canine diffuse large B-cell lymphoma; CIDE, DFF45-like effector; CiDEA, Cell-death-inducing DNA fragmentation factor  $\alpha$ -like effector A; CLL, chronic lymphocytic leukemia; CNVs, copy number variations; CpG, cytosine-guanine sequence; CpGI, CpG island; CTRL, control; DAVID, Database for Annotation, Visualization and Integrated Discovery; DEC, decitabine; DFF45, DNA fragmentation factor-45; DLBCL, diffuse large B-cell lymphoma; DMSO, dimethyl sulphoxide; ECACC, European Collection of Authenticated Cell Cultures; FBS, fetal bovine serum; GAPDH, glyceraldehyde-3-phosphate dehydrogenase; GEX, gene expression; HDACis, histone deacetylase inhibitors; HDs, hypomethylating drugs; ICGs, internal control genes; IOD, integrated optical density; LNs, lymph nodes; MAL, Myelin and Lymphocyte protein; MBD, Methyl-CpG-binding sequencing; MET, DNA methylation; Meth, methylated DNA; MSP, Methyl Specific PCR; MYC, MYC protooncogene; NF-kB, nuclear factor kB; No Meth, unmethylated DNA; PCCs, primary cell cultures; PCDH17, Protocadherin 17; PRAME, preferentially expressed antigen in melanoma; qPCR, quantitative Real Time PCR; RNA-seq, RNA sequencing; RQ, relative expression values; SAHA, vorinostat; SEM, standard error of the mean; TBS, Tris-buffered saline buffer; TFBSs, transcription factor binding sites; TFs, transcription factors; TSA, trichostatin A; TSGs, tumour suppressor genes; TSS, transcription starting site; VAL, valproic acid.

## Tables

**Table S1.** Canine DLBCL primary cell cultures (PCCs): signalment and clinical stage of dogs included in the study as well as laboratory findings at isolation time.

| Primary cell culture ID | Histological diagnosis | Signalment          | Clinical stage and substage | Total cell number    | Mortality (%) | Immunophenotyping                                                | Clonality assessment  |
|-------------------------|------------------------|---------------------|-----------------------------|----------------------|---------------|------------------------------------------------------------------|-----------------------|
| PCC2                    | DLBCL                  | Maltese, F, 13 yy   | III a                       | 5.52*10 <sup>8</sup> | 18.0          | CD21/CD45+ 71%, CD5+ 13%, CD4+ 6.4%, CD8+ 5%                     | IgH +, TCR $\gamma$ - |
| PCC5                    | DLBCL                  | Crossbred, F, 10 yy | V b                         | 7.88*10 <sup>8</sup> | 2.7           | CD21+ 66.2%, CD5+ 2.5%, CD4+ 1.7%, CD8+ 0.2%, CD25+ 16.7%, CD34- | IgH +, TCR $\gamma$ - |
| PCC6                    | DLBCL                  | Dobermann, F, 6 yy  | V a                         | 8.04*10 <sup>8</sup> | 2.5           | CD21+ 74%, CD5+ 2.5%, CD4+ 1.7%, CD8+ 0.8%, CD25+ 17.7%, CD34-   | IgH +, TCR $\gamma$ - |
| PCC7                    | DLBCL                  | Beagle, M, 6 yy     | V b                         | 1.17*10 <sup>9</sup> | 4.0           | CD45+ 66%, CD21+ 54%, CD5+ 4%                                    | IgH +, TCR $\gamma$ - |

**Table S2.** Cytotoxicity of hypomethylating agents (AZA and DEC) and histone deacetylase inhibitors (VAL, SAHA and TSA) in cDLBCL primary cell cultures (PCCs).

| Cell lines | Cytotoxicity (%)* |                  |            |                  |                   |
|------------|-------------------|------------------|------------|------------------|-------------------|
|            | AZA 3.4 $\mu$ M   | DEC 0.13 $\mu$ M | VAL 1.7 mM | SAHA 0.7 $\mu$ M | TSA 0.012 $\mu$ M |
| PCC2       | n.a.              | n.a.             | n.a.       | n.a.             | n.a.              |
| PCC5       | 51.8              | 0.0              | 35.6       | 17.3             | 11.9              |
| PCC6       | 59.4              | 10.0             | 41.1       | 22.2             | 24.6              |
| PCC7       | 74.0              | 2.0              | 16.6       | 12.3             | 32.4              |

\* Cytotoxicity vs. the respective control (medium for AZA and VAL; DMSO for DEC, SAHA and TSA); n.a.: not available. Alamar blue test was used.

**Table S3.** Putative transcription factors binding sites predicted in CiDEA\_CpGI1, MAL\_CpGI1, PCDH17\_CpGI1 and PCDH17\_CpGI3 regions.

| TFs            | DESCRIPTION                                                        | MATRIX FAMILY | CiDEA_CpGI1 | MAL_CpGI1 | PCDH17_CpGI1 | PCDH17_CpGI3 |
|----------------|--------------------------------------------------------------------|---------------|-------------|-----------|--------------|--------------|
| AP1            | AP-1 Transcription Factor                                          | V\$AP1R       |             | X         |              |              |
| AP2            | AP-2 Transcription Factor                                          | V\$AP2F       | X           | X         | X            | X            |
| AP4            | AP-4 Transcription Factor                                          | V\$AP4R       | X           |           |              | X            |
| CMYB           | MYB Proto-Oncogene, Transcription Factor                           | V\$MYBL       |             |           | X            | X            |
| CREB1          | cAMP Responsive Element Binding Protein 1                          | V\$CREB       |             |           |              | X            |
| EBF1           | Early B-Cell Factor 1                                              | V\$EBF1       | X           | X         |              |              |
| EGR1           | Early Growth Response 1                                            | V\$EGRF       | X           |           | X            |              |
| EGR2           | Early Growth Response 2                                            | V\$EGRF       |             |           | X            |              |
| ER $\alpha$    | Estrogen Receptor Alpha                                            | V\$ER         | X           |           |              |              |
| GATA1          | GATA-Binding Factor 1                                              | V\$GATA       |             |           |              | X            |
| GCF2           | GC-Rich Sequence DNA-Binding Factor 2                              | V\$GCF2       | X           |           |              |              |
| GFI1           | Growth Factor Independent 1 Transcriptional Repressor              | V\$GFI1       |             |           |              | X            |
| HINF-P         | Histone H4 Transcription Factor                                    | V\$HNFP       |             | X         |              |              |
| HSF2           | Heat Shock Transcription Factor 2                                  | V\$HEAT       |             |           |              | X            |
| LYF1           | Lymphoid Transcription Factor 1                                    | V\$IKRS       |             |           | X            | X            |
| MECOM          | Zinc Finger Protein Evi1                                           | V\$EVI1       |             | X         |              |              |
| MYOD1          | Myogenic Differentiation 1                                         | V\$MYOD       |             |           |              | X            |
| MZF1           | Myeloid Zinc Finger 1                                              | V\$MZF1       | X           | X         | X            | X            |
| NF1            | Neurofibromin 1                                                    | V\$NF1F       |             |           | X            | X            |
| NF-kB          | Nuclear Factor-kappa B                                             | V\$NFKB       | X           | X         | X            | X            |
| NKX2-5 (HMX2)  | NK2 Homeobox 5                                                     | V\$NKXH       |             | X         |              | X            |
| P300           | P300 coactivator                                                   | V\$P300       |             |           |              | X            |
| P53            | P53 Tumor Suppressor                                               | V\$P53F       |             | X         |              |              |
| PATZ1          | POZ/BTB and AT Hook Containing Zinc Finger 1                       | V\$MAZF       | X           | X         |              |              |
| PAX5           | Paired Box Gene 5 (B-cell Lineage Specific Activator)              | V\$PAX5       | X           | X         | X            | X            |
| RFX1           | Regulatory Factor X1                                               | V\$XBBF       |             | X         |              | X            |
| SP1            | Stimulating Protein 1, ubiquitous zinc finger transcription factor | V\$SP1F       | X           | X         | X            | X            |
| SPI-1          | Hematopoietic Transcription Factor PU.1                            | V\$ETSF       |             | X         |              |              |
| STAT1          | Signal Transducer and Activator of Transcription 1                 | V\$STAT       |             | X         |              |              |
| STAT3          | Signal Transducer and Activator of Transcription 3                 | V\$STAT       |             | X         |              |              |
| TAL1           | TAL BHLH Transcription Factor 1, Erythroid Differentiation Factor  | V\$HAND       |             | X         |              | X            |
| TBX2 (T gene)  | T-Box Transcription Factor 2                                       | V\$BRAC       |             | X         |              |              |
| WT1            | WT1 Transcription Factor                                           | V\$EGRF       |             | X         | X            |              |
| ZBTB7A         | Zinc Finger and BTB Domain Containing 7A                           | V\$ZF02       |             | X         |              | X            |
| ZNF02 (ZNF219) | C2H2 Zinc Finger Transcription Factors 2                           | V\$ZF02       |             | X         | X            | X            |

**Table S4.** Efficient qPCR assays used for mRNA amplification: oligonucleotides and assay parameters (efficiency %, R<sup>2</sup> and dynamic range).

| Transcript     | Ensembl ID         | Primer sequence (5' – 3')                                | Amplicon length (bp) | Primer final concentration (nM) | Efficiency (%) | R <sup>2</sup> | Dynamic range (Ct) |
|----------------|--------------------|----------------------------------------------------------|----------------------|---------------------------------|----------------|----------------|--------------------|
| <i>BMP7</i>    | ENSCAFT0000009354  | F: TGGTCATGAGCTTCGTC AAC<br>R: AGCACCTGGTAAACGCTGAT      | 199                  | 300/300                         | 107            | 0.98           | 29.19 - 36.45      |
| <i>CD1D</i>    | ENSCAFT00000018156 | F: TTCCAAGGGTCTCACTGGGTG<br>R: GGTTCGCTCTTGCTTCTCCAGTT   | 185                  | 300/300                         | 105            | 1.00           | 27.15 - 33.23      |
| <i>CiDEA</i>   | ENSCAFT00000036541 | F: ACGTGAAGGCCACCATGTAT<br>R: TGAGCAACTGTCCAGTCACC       | 129                  | 300/50                          | 95             | 0.99           | 30.40 - 36.20      |
| <i>CYP1A1</i>  | ENSCAFT00000028474 | F: GCTTCATGCAAAAGATGGTCAAG<br>R: GTTGTGACTGTGTCAAATCCAGC | 193                  | 300/300                         | 110            | 0.89           | 29.29 - 33.30      |
| <i>CXCL14</i>  | ENSCAFT00000001652 | F: AAGTGCAAGTGCTCCCGAAA<br>R: GACACGCTCTTGGTGGTGAT       | 122                  | 300/300                         | 96             | 1.00           | 19.68 - 29.45      |
| <i>LEF1</i>    | ENSCATG00000017891 | F: ACGAGTCCGAAATCATCCCG<br>R: TGCTTTCCGTCATCAGGGTG       | 112                  | 300/50                          | 109            | 1.00           | 21.80 - 27.38      |
| <i>LHX8</i>    | ENSCAFT00000043981 | F: CCAAAACCAGCAAAAAGAGC<br>R: TGGCGTGCTCTACAATTCTG       | 176                  | 300/300                         | 93             | 0.99           | 22.88 - 33.60      |
| <i>MAL</i>     | ENSCAFT00000011303 | F: TTCTCCGTCTTCACGACCTT<br>R: ACGAGGCAATCAAGATCCAC       | 85                   | 300/50                          | 93             | 1.00           | 19.22 - 31.09      |
| <i>PCDH17</i>  | ENSCAFT00000007840 | F: CTGCCACTCGGATGTCCATA<br>R: CCTTAAACGTGGAGCTACTTTG     | 102                  | 300/300                         | 103            | 0.99           | 23.41 - 32.73      |
| <i>RIPK4</i>   | ENSCAFT00000016214 | F: CAAGATCTGGACACGAAGCA<br>R: CTGAGAGGTACCCGAATCCA       | 144                  | 50/50                           | 110            | 0.92           | 32.84- 38.65       |
| <i>SCN3B</i>   | ENSCAFT00000018312 | F: AGTTTGCTTTTGAAGCACATCG<br>R: TTCAGCCTTTGAGACCTTCCTG   | 191                  | 300/50                          | 97             | 0.99           | 22.89 - 34.02      |
| <i>SLC44A3</i> | ENSCAFT00000032001 | F: GTCGACATCCTCCATCGAAT<br>R: AGAAGGGTGGTGATGAATCG       | 128                  | 50/50                           | 105            | 0.91           | 29.79 - 37.38      |
| <i>TCF7</i>    | ENSCAFT00000001527 | F: AGCACCAGGAATCTACCACAG<br>R: GCACTGTCATCGGAAGGAA       | 96                   | 300/300                         | 100            | 1.00           | 19.57 - 27.65      |
| <i>RPL8</i>    | ENSCAFT00000002627 | Da Ros et al. (2018)*                                    |                      |                                 |                |                |                    |
| <i>CCZ1</i>    | ENSCAFT00030034933 | Da Ros et al. (2018)*                                    |                      |                                 | 102            | 1.0            | 20.85 - 31.46      |
| <i>GOLGA1</i>  | ENSCAFT00000088944 | Da Ros et al. (2018)*                                    |                      |                                 | 102            | 1.0            | 23.30 – 33.71      |

\*Da Ros, S.; Aresu, L.; Ferraresso, S.; Zorzan, E.; Gaudio, E.; Bertoni, F.; Dacasto, M.; Giantin M. Validation of epigenetic mechanisms regulating gene expression in canine B-cell lymphoma: An in vitro and in vivo approach. *PLoS One*. **2018**, *13*, e0208709. DOI: 10.1371/journal.pone.0208709.

**Table S5.** Oligonucleotides used for Methyl Specific PCR: sequence, final concentration and temperature set for the acquisition of the fluorescence signal.

| Gene          | Meth primers                                          |               |            | No Meth primers                                          |               |         |
|---------------|-------------------------------------------------------|---------------|------------|----------------------------------------------------------|---------------|---------|
|               | Sequence (5' – 3')                                    | [F/R]<br>(nM) | T*<br>(°C) | Sequence (5' – 3')                                       | [F/R]<br>(nM) | T* (°C) |
| <i>CIDEA</i>  | F: TATTTTCGTTTCGGGGAAGC<br>R: AACACCCAACGAAAAACTCG    | 300/50        | 77         | F: TATTTTGTTTGGGGAAGTGT<br>R: CAACACCCAACAAAAAACTCA      | 300/50        | 77      |
| <i>MAL</i>    | F: GGTATGGTTTTAGTAGCGGC<br>R: CCCGTACAACCTACGACTC     | 50/50         | 60         | F: GTATGGTTTTAGTAGTGGTGTT<br>R: CCATACAACCTACAACTCCA     | 50/50         | 60      |
| <i>PCDH17</i> | F: ATATCGTAAACGTTGATTGTC<br>R: CAACGCAAAAACTAATATCCCG | 300/300       | 60         | F: TTTATATTGTAAATGTTGATTGTT<br>R: ACAACACAAAACTAATATCCCA | 300/300       | 60      |
| <i>RPL8</i>   | Da Ros et al. (2018)*                                 | 50/50         | 77         | Da Ros et al. (2018)*                                    | 50/300        | 60      |

[F/R]: concentration of forward and reverse primers; \* Temperature set for fluorescence signal acquisition

\*Da Ros, S.; Aresu, L.; Ferraresso, S.; Zorzan, E.; Gaudio, E.; Bertoni, F.; Dacasto, M.; Giantin M. Validation of epigenetic mechanisms regulating gene expression in canine B-cell lymphoma: An in vitro and in vivo approach. *PLoS One*. **2018**, *13*, e0208709. DOI: 10.1371/journal.pone.0208709.

**Table S6.** Primer sequences and restriction enzymes used for *CiDEA* and *MAL* full-length sequence amplification and cloning.

|                    | Primer sequence (5'-3')                                                                                    | T used for PCR<br>amplification (°C) | Amplicon length<br>(bp) | Restriction enzymes |
|--------------------|------------------------------------------------------------------------------------------------------------|--------------------------------------|-------------------------|---------------------|
| <b>CiDEA_#PCR1</b> | F: GGC <b>G</b> GGGCTTTAAGAGCG<br>R: TATCTCCAAAATCATCATTTGAGAGGG                                           | 60                                   | 786                     | -                   |
| <b>MAL_#PCR1</b>   | F: AGCCGCGCGTCCAGCCCG<br>R: GGAAGGCAGGCTGATCAGTTAACACCGTCT                                                 | 70                                   | 541                     | -                   |
| <b>CiDEA_#PCR2</b> | F: GAG <b>ctc</b> G <b>Ag</b> CCA <b>aCc</b> ATGGAGACCGC<br>R: CCCTG <b>ac</b> GC <b>g</b> TGCCTATCTGCATGT | 68                                   | 688                     | XhoI<br>MluI        |
| <b>MAL_#PCR2</b>   | F: GTCCAG <b>Cta</b> GCC <b>ac</b> ATGGCCCCA<br>R: AAG <b>TaCgcg</b> TGCTTTATGAAGACTTCCATCTGATT            | 68                                   | 490                     | NheI<br>MluI        |

#PCR1 from total cDNA; #PCR2 Nested-PCR.

The melting temperature recommended for Q5 High-Fidelity DNA Polymerase was calculated using a specific calculator freely available at <http://tmcalculator.neb.com/>. Sites recognized by XhoI, MluI and NheI restriction enzymes are highlighted in grey, while the Kozak sequence (5'-ACCATGG-3') is underlined; bases that were modified respect to the wild type sequence are bolded and in lowercase.

**Table S7.** Primer pairs used to amplify *CiDEA*, *MAL* and *PCDH17* CpG-rich regions from canine genome and annealing temperature used.

| GENE               | CpG island position from TSS (+1) | CpG island length (bp) | Primer sequence (5'-3')                                  | T used for PCR amplification |
|--------------------|-----------------------------------|------------------------|----------------------------------------------------------|------------------------------|
| <b>CiDEA_CpG1</b>  | +210/+510                         | 300                    | F: GCGACACATCTACCTTTTCA<br>R: AGGCGTGGCCGCGAG            | 62°C                         |
| <b>CiDEA_CpG2</b>  | +710/+1510                        | 800                    | F: CCCCTCGTGCCCCCAGCG<br>R: GATCTTCAAAGAAGCACTGGCCCTTCC  | 65°C                         |
| <b>MAL_CpG1</b>    | -822/+578                         | 300                    | F: AAGATTAAATCTTAGTCCAGGAAGAAA<br>R: AGCTGGGCACTCCTACAAG | 60°C                         |
| <b>PCDH17_CpG1</b> | -3779/-2779                       | 1000                   | F: TGCTTCTGGAGGAAGACGGT<br>R: CTCTTCTATCACGGGTGGTCTC     | 60°C                         |
| <b>PCDH17_CpG2</b> | -2379/-1879                       | 500                    | F: CCTCCAAAACATGAATCTGGCTTTT<br>R: GTAGGAGTGGGCTGGATGGAA | 60°C                         |
| <b>PCDH17_CpG3</b> | -1679/-579                        | 1100                   | F: CCATGAGTTGCCTGTTGATTTC<br>R: GACTTGGGGACACTCAAAGTTGA  | 65°C                         |
| <b>PCDH17_CpG4</b> | -479/+721                         | 1202                   | F: GGTTCCGGGGAAGTTGAGCGGAA<br>R: AGGACCCTGCACTGCAGCTG    | 60°C                         |
| <b>PCDH17_CpG5</b> | +821/+2421                        | 1600                   | F: CAAGCTGGAGGAGAACTACGACAA<br>R: TCCTGGTCCGAAGGTGTCAGG  | 60°C                         |

Positions of the amplified regions are relative to the transcription starting site (TSS, +1) of the respective gene. The melting temperature (T<sub>m</sub>) recommended for Q5 High-Fidelity DNA Polymerase was calculated using a specific calculator freely available at <http://tmcalculator.neb.com/>.

**Table S8.** Oligonucleotides and restriction enzymes used for Nested-PCR and cloning of *CiDEA*, *MAL* and *PCDH17* CpG-rich regions.

| GENE                | Primer sequence (5'-3')                                | T used for PCR amplification | Restriction enzymes |
|---------------------|--------------------------------------------------------|------------------------------|---------------------|
| <b>CiDEA_CpGI1</b>  | F: GTC <b>a</b> CtAGTCACCCCGTCTCGG                     | 65°C                         | BcuI                |
|                     | R: GCA <b>a</b> GCtTGGCCGCGAGCC                        |                              | HindIII             |
| <b>CiDEA_CpGI2</b>  | F: CTCCTGC <b>a</b> gCCGGCATCCC                        | 60°C                         | PstI                |
|                     | R: CTTCCAt <b>G</b> gGATATTTTATCAACAAAGACA             |                              | NcoI                |
| <b>MAL_CpGI1</b>    | F: AAAC <b>a</b> g <b>g</b> ATCCAGGCAATGGGAGGG         | 65°C                         | BamHI               |
|                     | R: CAAG <b>G</b> c <b>C</b> aT <b>g</b> GCCCTCTCGGAAGG |                              | NcoI                |
| <b>PCDH17_CpGI1</b> | F: GGTAGCT <b>G</b> cAGACTCTGGAGAGC                    | 65°C                         | PstI                |
|                     | R: TCAG <b>C</b> c <b>C</b> AT <b>g</b> GCCTGCAAAAGAC  |                              | NcoI                |
| <b>PCDH17_CpGI2</b> | F: CAGAGAA <b>Acta</b> GTTAGGAAGAAGCCG                 | 60°C                         | BcuI                |
|                     | R: GTGA <b>a</b> GCtTTCTGCAGTCTGGC                     |                              | HindIII             |
| <b>PCDH17_CpGI3</b> | F: AAAC <b>T</b> GC <b>a</b> gCGAGAGGAGTCA             | 62°C                         | PstI                |
|                     | R: GTGT <b>C</b> C <b>a</b> t <b>G</b> GCTCCCGCTAG     |                              | NcoI                |
| <b>PCDH17_CpGI4</b> | F: AAGGA <b>t</b> CCACGGACTCGGGGC                      | 65°C                         | BamHI               |
|                     | R: CCC <b>a</b> TGGCGCACGGAGACG                        |                              | NcoI                |
| <b>PCDH17_CpGI5</b> | F: CAGGA <b>Ct</b> AGTACAACGTGACGA                     | 61°C                         | BcuI                |
|                     | R: AGTT <b>Aa</b> G <b>Ct</b> tCAAGTCTCTTACCTG         |                              | HindIII             |

Sites recognized by BcuI, HindIII, PstI, NcoI and BamHI restriction enzymes are highlighted in grey; bases that were modified respect to the wild type sequence are bolded and in lowercase. The melting temperature recommended for Q5 High-Fidelity DNA Polymerase was calculated using a specific calculator freely available at <http://tmcalculator.neb.com/>.



## Figures

|                    | MBD-seq         |            |        | RNA-seq       |               | aCGH    | Statistical correlation | Number of not redundant genes |                            |           |
|--------------------|-----------------|------------|--------|---------------|---------------|---------|-------------------------|-------------------------------|----------------------------|-----------|
|                    | Hypermethylated |            |        | Downregulated | Not expressed | no CNVs | MET vs GEX              | First screening               | Literature-based filtering | Selection |
|                    | promoter        | intergenic | exonic |               |               |         |                         |                               |                            |           |
| List 1             | ✓               |            |        | ✓             |               | ✓       |                         | 162                           | 24                         | 11        |
| List 2             |                 | ✓          |        | ✓             |               | ✓       |                         | 36                            | 6                          | 3         |
| List 3             |                 |            | ✓      | ✓             |               | ✓       |                         | 44                            | 6                          | 4         |
| List 4             | ✓               | ✓          | ✓      |               | ✓             | ✓       |                         | 67                            | 10                         | 2         |
| List 5             | ✓               | ✓          | ✓      | ✓             |               | ✓       | ✓                       | 30                            | 5                          | 1         |
| Total no. of genes |                 |            |        |               |               |         |                         | 339                           | 50                         | 21        |

| Gene           | Ensembl ID         | Description                                       | Category (list)                         |
|----------------|--------------------|---------------------------------------------------|-----------------------------------------|
| <i>AJAP1</i>   | ENSCAFG00000019507 | adherens junctions associated protein 1           | HyperM*(promoter)_downregulated_noCNV** |
| <i>BCL11B</i>  | ENSCAFG00000017809 | B-cell CLL/lymphoma 11B                           | Correlated_HyperM_downregulated_noCNV   |
| <i>BMP7</i>    | ENSCAFG00000012011 | bone morphogenetic protein 7                      | HyperM(promoter)_downregulated_noCNV    |
| <i>CD1D</i>    | ENSCAFG00000030554 | CD1d molecule                                     | HyperM(intergenic)_downregulated_noCNV  |
| <i>CIDEA</i>   | ENSCAFG00000018828 | cell death-inducing DFFA-like effector a          | HyperM(exonic)_downregulated_noCNV      |
| <i>CLDN3</i>   | ENSCAFG00000012532 | claudin-3                                         | HyperM(exonic)_downregulated_noCNV      |
| <i>CXCL14</i>  | ENSCAFG0000001084  | C-X-C motif chemokine ligand 14                   | HyperM(promoter)_downregulated_noCNV    |
| <i>CYP1A1</i>  | ENSCAFG00000017937 | cytochrome P450 family 1 subfamily A member 1     | HyperM(promoter)_downregulated_noCNV    |
| <i>HOXA11</i>  | ENSCAFG00000002966 | homeobox A11                                      | HyperM_notexpressed_noCNV               |
| <i>HOXD10</i>  | ENSCAFG00000013447 | homeobox D10                                      | HyperM_notexpressed_noCNV               |
| <i>LEF1</i>    | ENSCAFG00000011252 | lymphoid enhancer binding factor 1                | HyperM(promoter)_downregulated_noCNV    |
| <i>LHX8</i>    | ENSCAFG00000020401 | LIM homeobox 8                                    | HyperM(exonic)_downregulated_noCNV      |
| <i>MAL</i>     | ENSCAFG00000007047 | mal, T-cell differentiation protein               | HyperM(promoter)_downregulated_noCNV    |
| <i>PAK5</i>    | ENSCAFG00000005685 | p21 (RAC1) activated kinase 5                     | HyperM(promoter)_downregulated_noCNV    |
| <i>PCDH10</i>  | ENSCAFG00000003785 | protocadherin 10                                  | HyperM(exonic)_downregulated_noCNV      |
| <i>PCDH17</i>  | ENSCAFG00000004870 | protocadherin 17                                  | HyperM(intergenic)_downregulated_noCNV  |
| <i>RIPK4</i>   | ENSCAFG00000010213 | receptor interacting serine/threonine kinase 4    | HyperM(promoter)_downregulated_noCNV    |
| <i>SCN3B</i>   | ENSCAFG00000011538 | sodium voltage-gated channel beta subunit 3       | HyperM(promoter)_downregulated_noCNV    |
| <i>SLC44A3</i> | ENSCAFG00000020108 | solute carrier family 44 member 3                 | HyperM(promoter)_downregulated_noCNV    |
| <i>TCF7</i>    | ENSCAFG00000000990 | transcription factor 7 (T-cell specific, HMG-box) | HyperM(intergenic)_downregulated_noCNV  |
| <i>TEKT3</i>   | ENSCAFG00000017923 | tektin 3                                          | HyperM(promoter)_downregulated_noCNV    |

\*HyperM: hypermethylated gene

\*\*noCNV: gene without Copy Number Variations

**Figure S1.** Candidate genes selection: summary of the bioinformatics filters used and list of selected targets. The number of genes identified in each step of the analysis is reported. Ensembl Genome Browser ID, description and category (list) is also provided. MBD-seq: Methyl-CpG-binding sequencing; CNVs: Copy Number Variations; MET: DNA methylation; GEX: gene expression

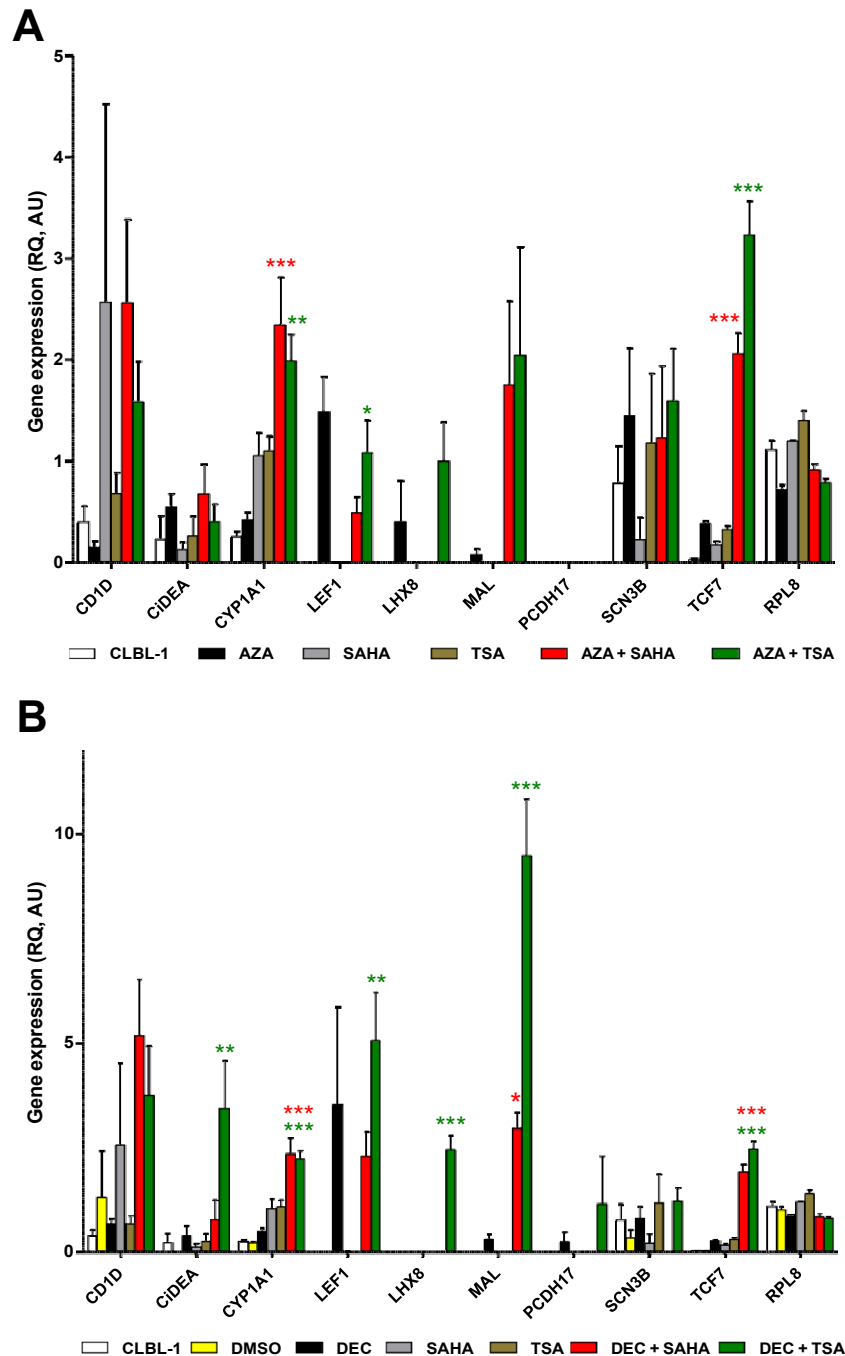

**Figure S2.** Effect of the treatment with AZA or DEC in combination with SAHA or TSA on the mRNA expression of 9 candidate TSGs in CLBL-1 cells. (A) AZA, (B) DEC. The expression levels of the target mRNAs (relative expression values, RQ), evaluated by qPCR and normalized to *GOLGA1* and *CCZ1*, are expressed in arbitrary units (AU), as the mean  $\pm$  SEM of 4 independent experiments. *CXCL14*, *RIPK4* and *SLC44A3* are not shown because they were not expressed in CLBL-1 cells both in control and treatment conditions. *RPL8*, the negative control gene, was not affected by the treatment, as expected. Statistical analysis: ANOVA + Bonferroni post hoc test. \*:  $P < 0.05$ ; \*\*:  $P < 0.01$ ; \*\*\*:  $P < 0.001$ . Only the statistical significance between CLBL-1 vs AZA+SAHA or AZA+TSA and DMSO vs DEC+SAHA or DEC+TSA is shown.

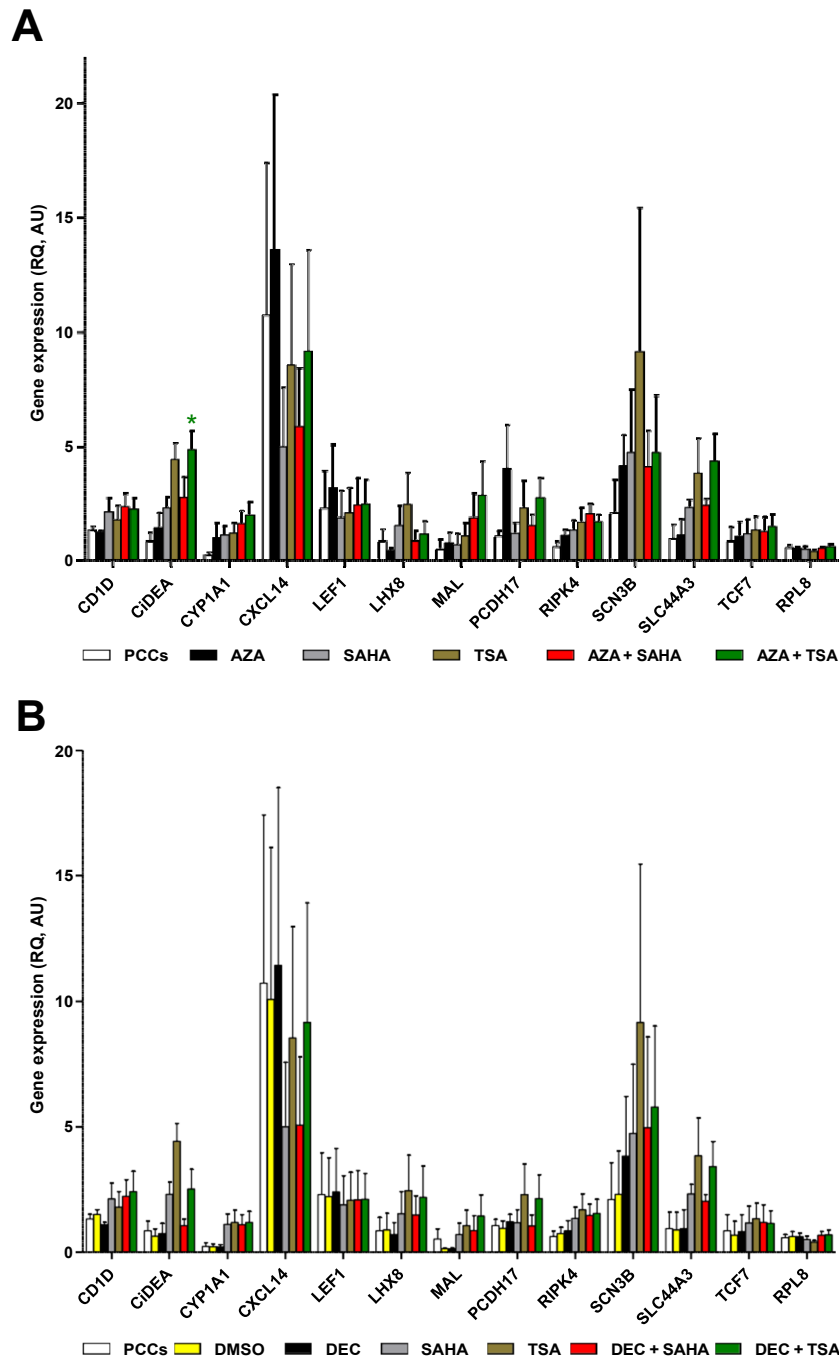

**Figure S3.** Effect of the treatment with AZA or DEC in combination with SAHA or TSA on the mRNA expression of 12 candidate TSGs in 4 cDLBCL primary cell cultures (PCCs). (A) AZA, (B) DEC. The expression levels of the target mRNAs (relative expression values, RQ), evaluated by qPCR and normalized to *GOLGA1* and *CCZ1*, are expressed in arbitrary units (AU), as the mean  $\pm$  SEM. *RPL8*, the negative control gene, was not affected by the treatment, as expected. Statistical analysis: ANOVA + Bonferroni post hoc test. \*:  $P < 0.05$ . The statistical significance between PCC vs AZA+SAHA or AZA+TSA and DMSO vs DEC+SAHA or DEC+TSA only is shown.

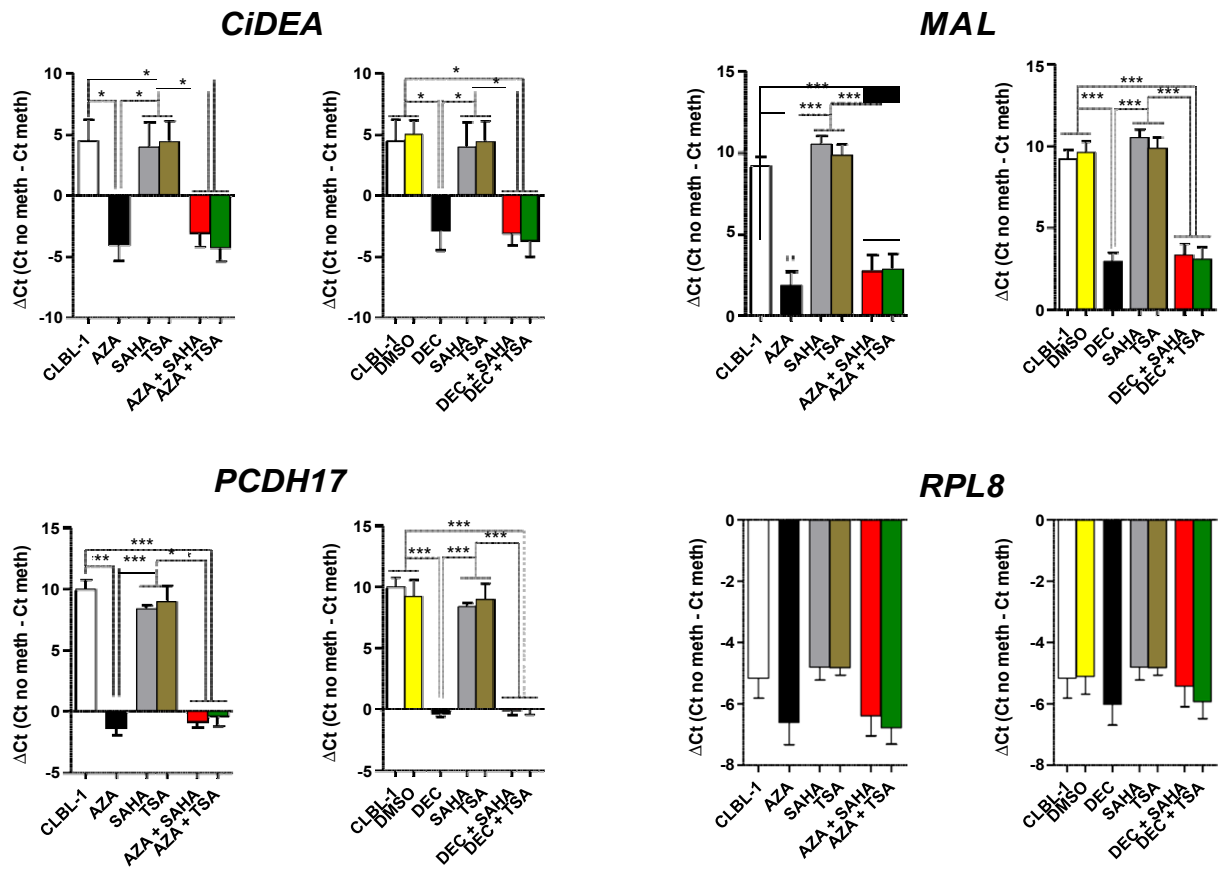

**Figure S4.** Effect of the treatment with AZA or DEC in combination with SAHA or TSA on *CiDEA*, *MAL*, *PCDH17* and *RPL8* methylation status in CLBL-1 cells. For each gene, the results of AZA are in the graph on the left, while results of DEC in the graph on the right. Data are expressed as  $\Delta\text{Ct}$  (= Ct No meth - Ct meth), as the mean  $\pm$  SEM of 4 independent experiments. Four independent PLs were analysed. Statistical analysis: ANOVA + Bonferroni post hoc test. (\*:  $P < 0.05$ ; \*\*:  $P < 0.01$ ; \*\*\*:  $P < 0.001$ ). *RPL8* (the negative control gene) was not affected by the treatment as expected.

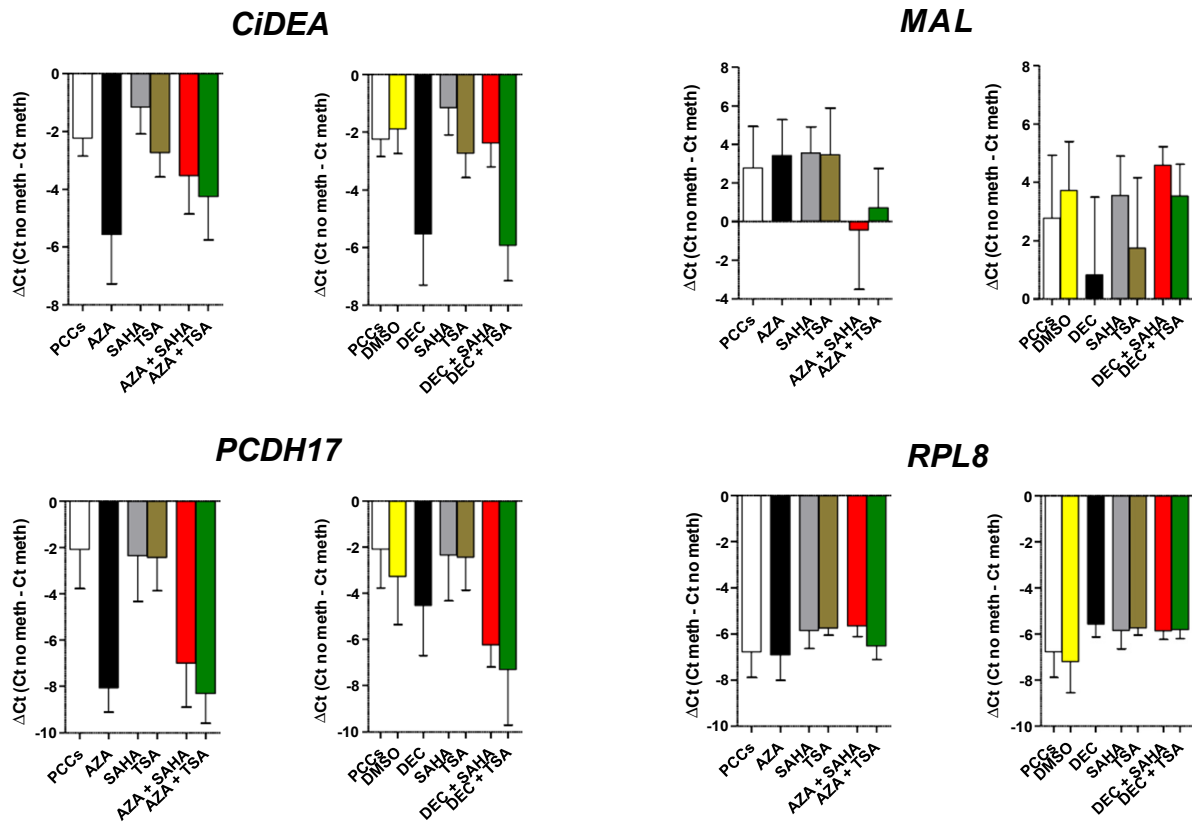

**Figure S5.** Effect of the treatment with AZA or DEC in combination with SAHA or TSA on *CiDEA*, *MAL*, *PCDH17* and *RPL8* methylation status in 4 cDLBCL primary cell cultures (PCCs). For each gene, the results of AZA are in the graph on the left, while results of DEC in the graph on the right. Data are expressed as  $\Delta Ct$  ( $= Ct \text{ No meth} - Ct \text{ meth}$ ), as the mean  $\pm$  SEM. Statistical analysis: ANOVA + Bonferroni post hoc test. (\*:  $P < 0.05$ ; \*\*:  $P < 0.01$ ; \*\*\*:  $P < 0.001$ ). *RPL8* (the negative control gene) was not affected by the treatment as expected.

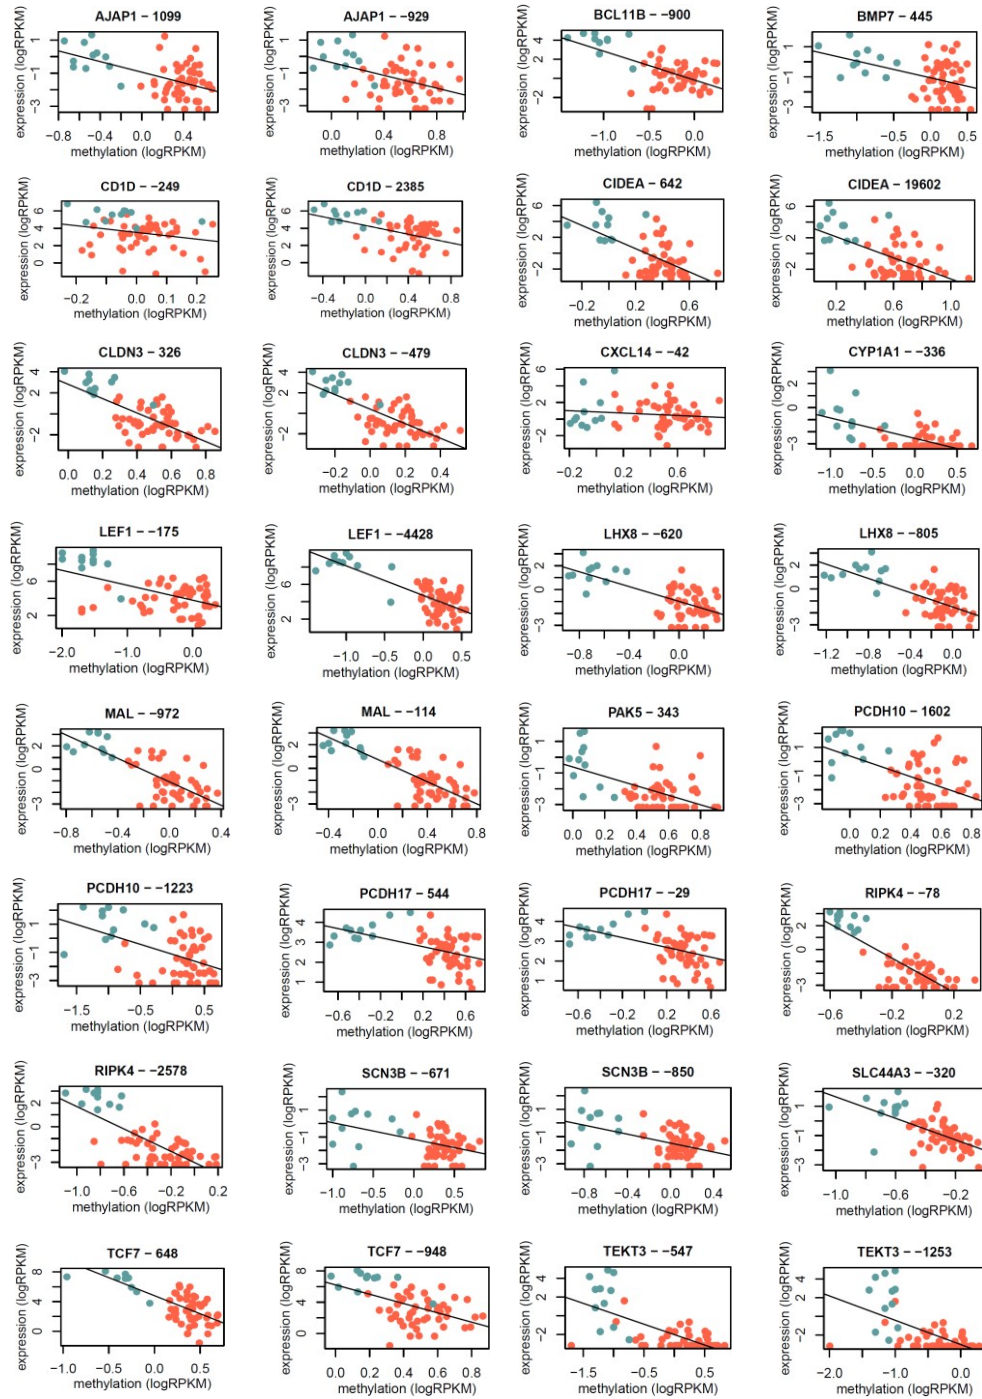

**Figure S6.** Correlations between DNA methylation and gene expression levels of candidate tumour suppressor genes in DLBCL and LN samples. Correlation charts for the complete cohort of samples (50 DLBCLs and 11 LNs) showing the inverse correlation ( $P < 0.05$ ,  $-1 < \rho < 0$ ) between DNA methylation and gene expression data (expressed in logRPKM). The results of 19 out of 21 candidate tumor suppressor genes are reported (*HOXA11* and *HOXD10* were excluded because they were not expressed in DLBCL samples). Red and green dots indicate single DLBCL and LN samples, respectively. The name of the gene and the CpG-rich region position from TSS are reported on the top of each plot. Statistical analysis: pairwise Pearson's correlation.
